# Supplementary material
Source: Springer Nature journal article supplement (https://www.springermedizin.de/resource/supplementary/12943_2009_566_MOESM16_ESM.pdf/9554984)
Supplement: MOESM16 [file 9554984]

**A****CoBRA analysis of 32 genes  
in cell lines**

| CELL LINES |            |
|------------|------------|
| ABT1       | 0/5 (0%)   |
| BARHL2     | 2/8 (25%)  |
| BUB3       | 0/9 (0%)   |
| CCNJ       | 0/6 (0%)   |
| CD44       | 3/6 (50%)  |
| CDH24      | 0/9 (0%)   |
| CENPJ      | 0/9 (0%)   |
| CIDE-A     | 7/8 (86%)  |
| COMP       | 4/6 (67%)  |
| DBC1       | 2/6 (33%)  |
| DDEF2      | 0/6 (0%)   |
| DLGAP1     | 5/5 (100%) |
| EMILIN2    | 5/9 (56%)  |
| EPSTI1     | 5/6 (83%)  |
| FBLN2      | 3/5 (60%)  |
| FOXF2      | 6/9 (67%)  |
| FOXQ1      | 1/6 (17%)  |
| GSC        | 3/9 (33%)  |
| KLF11      | 0/9 (0%)   |
| KLF13      | 0/6 (0%)   |
| LYPD5      | 3/6 (50%)  |
| MAD1L1     | 0/6 (0%)   |
| NRXN2      | 2/6 (33%)  |
| ONECUT1    | 0/9 (0%)   |
| PAX9       | 4/5 (80%)  |
| PHF2       | 0/6 (0%)   |
| POU4F1     | 6/8 (75%)  |
| SALL1      | 4/6 (67%)  |
| SALL3      | 3/4 (75%)  |
| SESN3      | 6/6 (100%) |
| SIM2       | 7/7 (100%) |
| TP53INP1   | 3/6 (50%)  |

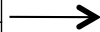**B****CoBRA analysis of 16 genes  
in primary tumours**

| PRIMARY TUMOURS |             |
|-----------------|-------------|
| CD44            | 1/24 (4%)   |
| CIDE-A          | 21/40 (53%) |
| COMP            | 20/33 (61%) |
| DBC1            | 8/31 (26%)  |
| EMILIN2         | 16/36 (44%) |
| EPSTI1          | 13/36 (36%) |
| FBLN2           | 13/38 (34%) |
| FOXF2           | 5/35 (14%)  |
| GSC             | 1/40 (3%)   |
| NRXN2           | 0/12 (0%)   |
| PAX9            | 8/39 (21%)  |
| POU4F1          | 4/27 (15%)  |
| SALL1           | 25/40 (63%) |
| SESN3           | 7/10 (70%)  |
| SIM2            | 24/29 (83%) |
| TP53INP1        | 0/18 (0%)   |

**Figure 1**
